# Supplementary material for: The future of the El Niño–Southern Oscillation: using large ensembles to illuminate time-varying responses and inter-model differences
Source: Copernicus journal article supplement (doi:10.5194/esd-14-413-2023), 2023-04-14
Supplement: Supplementary file 1 [file esd-14-413-2023-supplement.pdf]

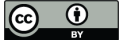

*Supplement of*

**The future of the El Niño–Southern Oscillation: using large ensembles to illuminate time-varying responses and inter-model differences**

**Nicola Maher et al.**

*Correspondence to:* Nicola Maher ([nicola.maher@colorado.edu](mailto:nicola.maher@colorado.edu))

The copyright of individual parts of the supplement might differ from the article licence.

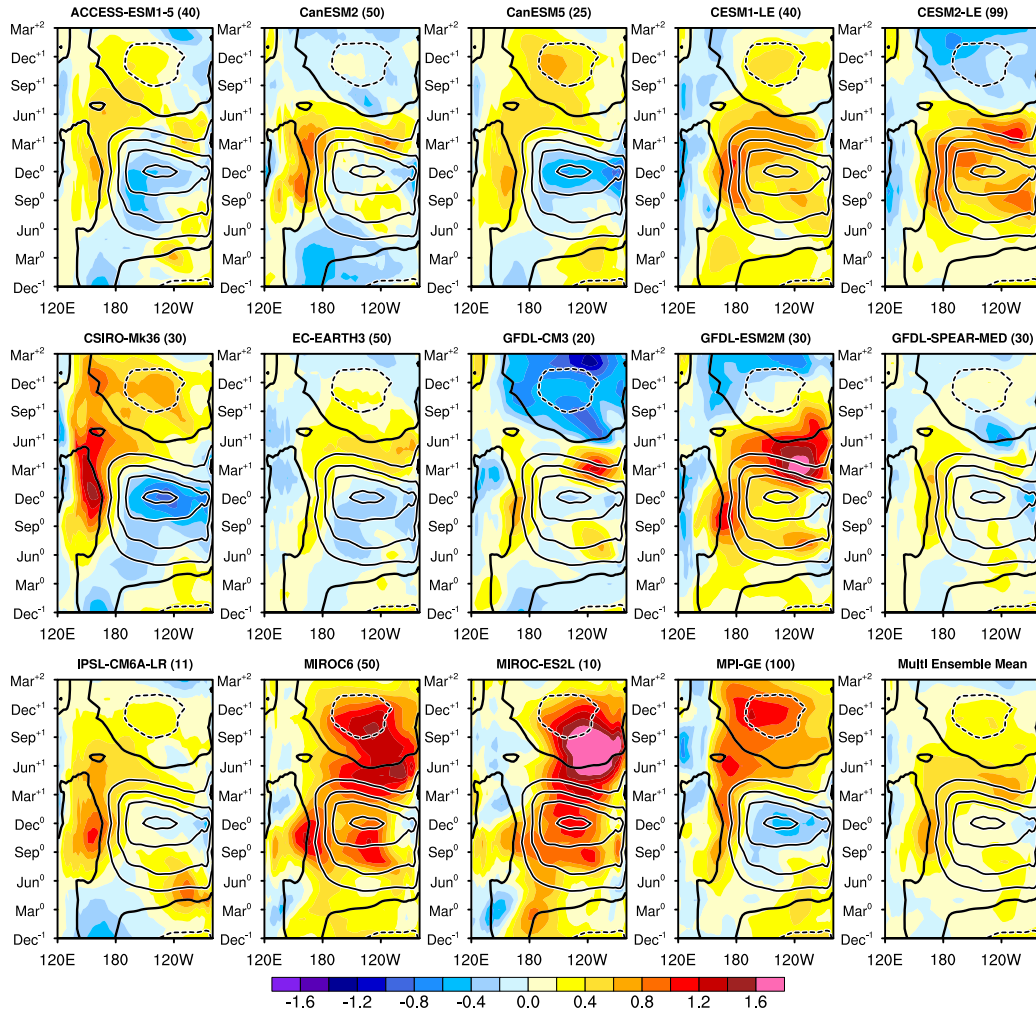

**Figure S1.** Longitude-time sections of the difference of equatorial Pacific ( $5^{\circ}\text{S}$ - $5^{\circ}\text{N}$ ) SST anomalies ( $^{\circ}\text{C}$ ; shading) composed for El Niño events during 1950-2014 in 14 models and the multi-ensemble mean compared to observations. The SST anomalies for observed El Niño events during 1950-2014 are overlaid ( $^{\circ}\text{C}$ ; contours at intervals of  $0.4^{\circ}\text{C}$ ; zero contours thickened and negative contours dashed). El Niño events are defined when the Niño3.4 index exceeds exceeds 0.75 standard deviations in Dec0 but not in Dec-1. Monthly SST anomalies are calculated by removing the ensemble mean from individual ensemble members.

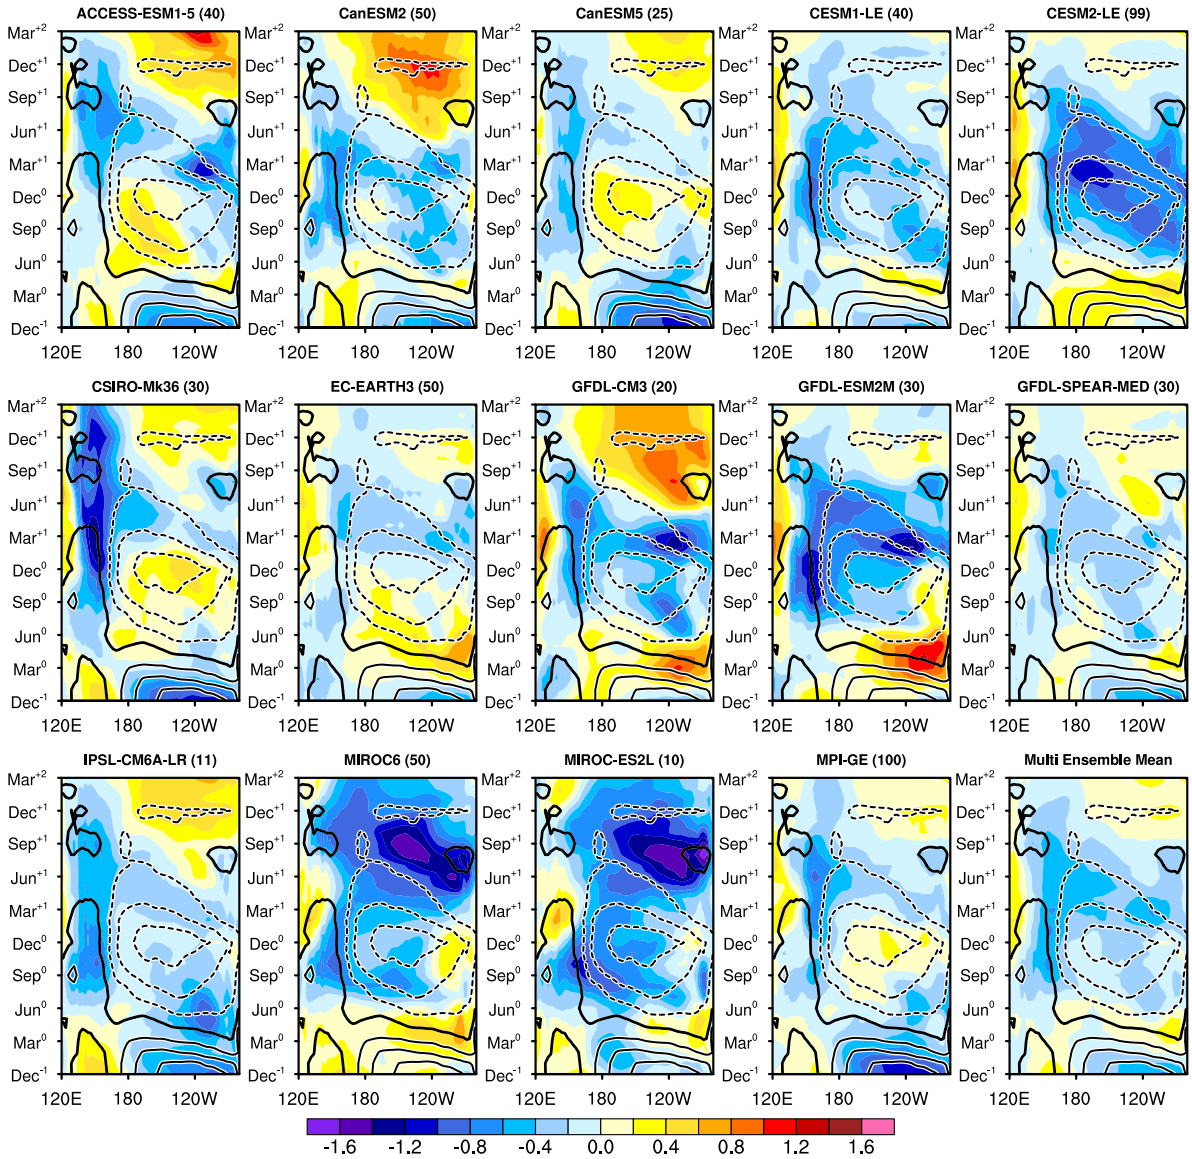

**Figure S2.** As in Figure S1, but for La Niña

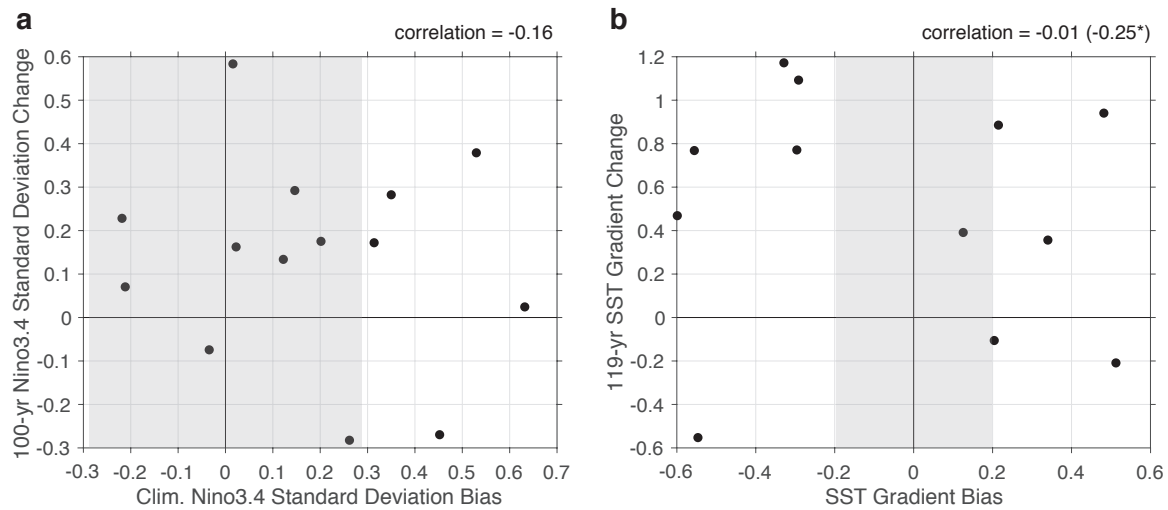

**Figure S3.** (a) Scatter plot of each model's ensemble-mean Niño3.4 amplitude change between 1951-1980 and 2051-2080 versus its climatological Niño3.4 amplitude in 1951-1980, referenced to the Niño3.4 amplitude in ERSST5 over the same period. (b) Scatter plot of each model's ensemble-mean Pacific SST gradient change between 1951-1980 and 2070-2099 versus its climatological Pacific SST gradient in 1951-1980, referenced to the Pacific SST gradient in ERSST5 over the same period. Pacific SST gradient is defined as in Figure 7 (x-axis). In each panel, the grey shading depicts the 95% range of internal variability in the observational quantity, estimated from the multi-model-mean of the ensemble-mean variance in the corresponding quantity. The correlations between the quantities in the scatter plots are depicted in the upper right. \*Note that the correlation increases to -0.25 if the outlier in the bottom left (CSIRO-Mk36) is excluded.

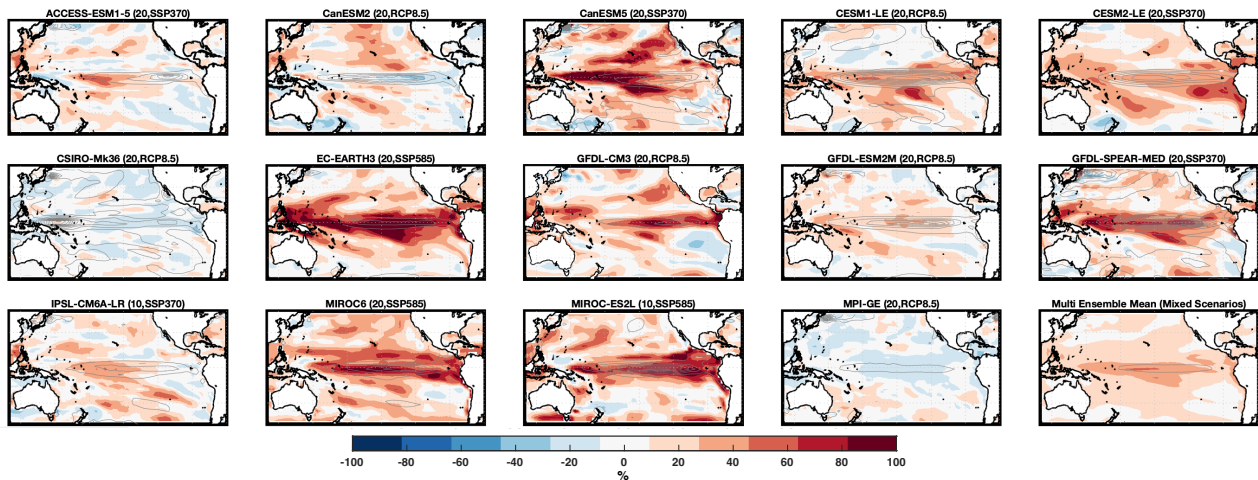

**Figure S4.** As in Figure 2, but for the period 2021-2050 compared to 1951-1980.

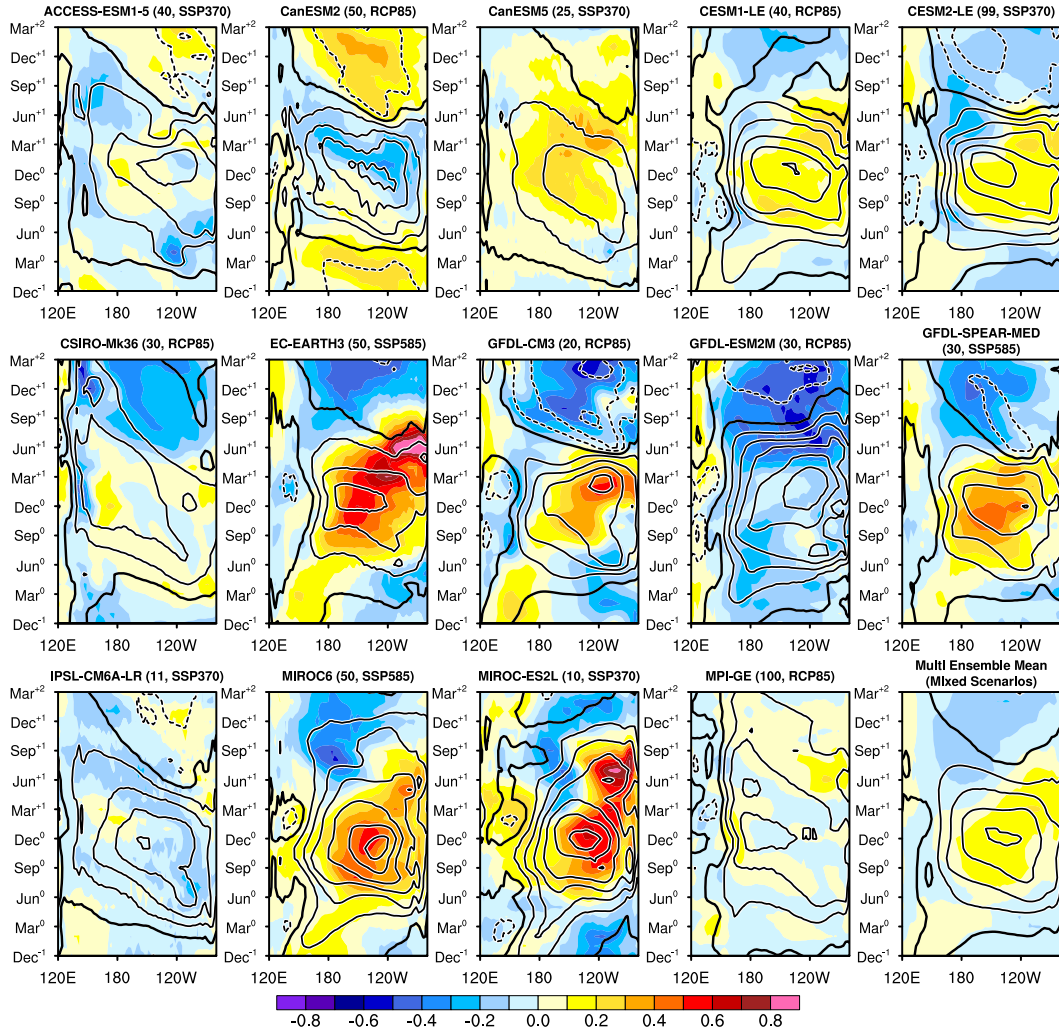

**Figure S5.** As in Figure 3, but for the difference between 2021-2050 and 1951-1980.

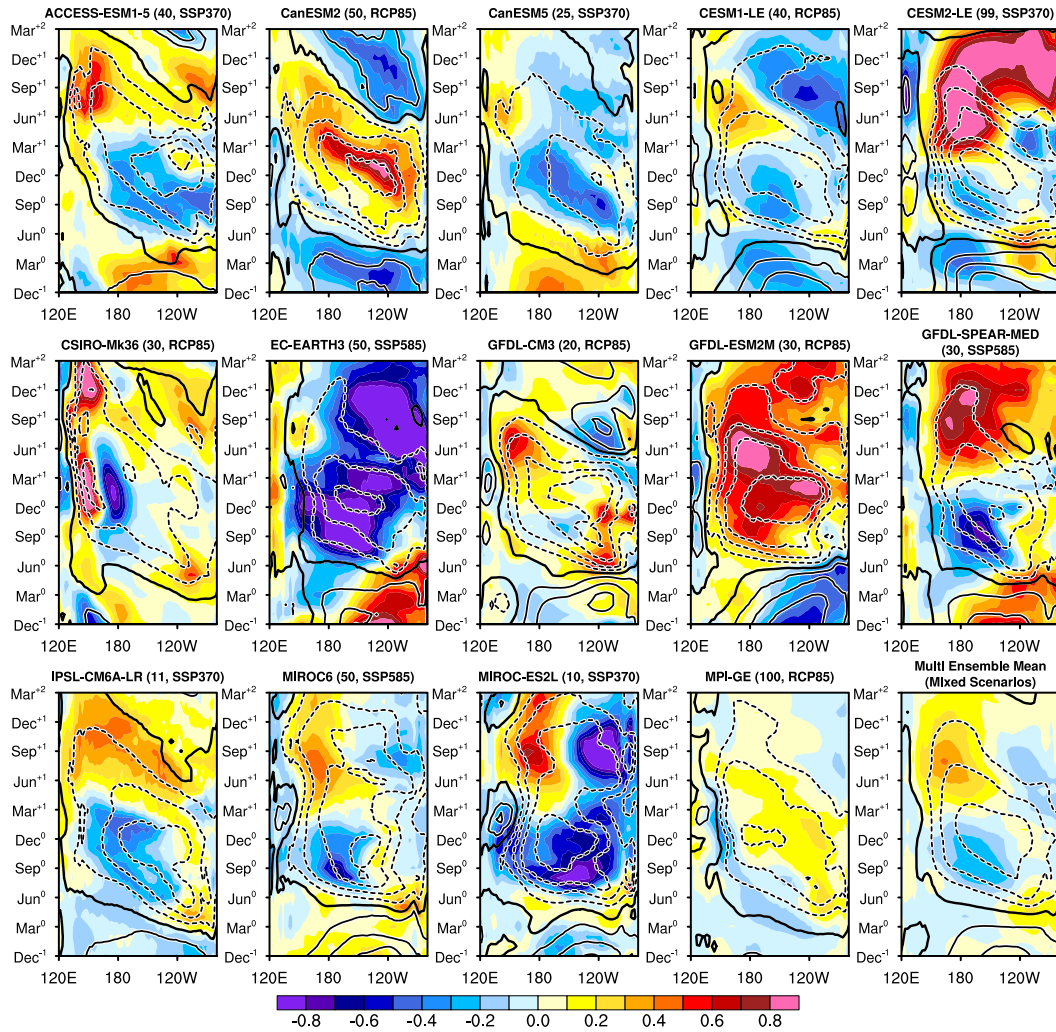

Figure S6. As in Figure 3, but for La Niña

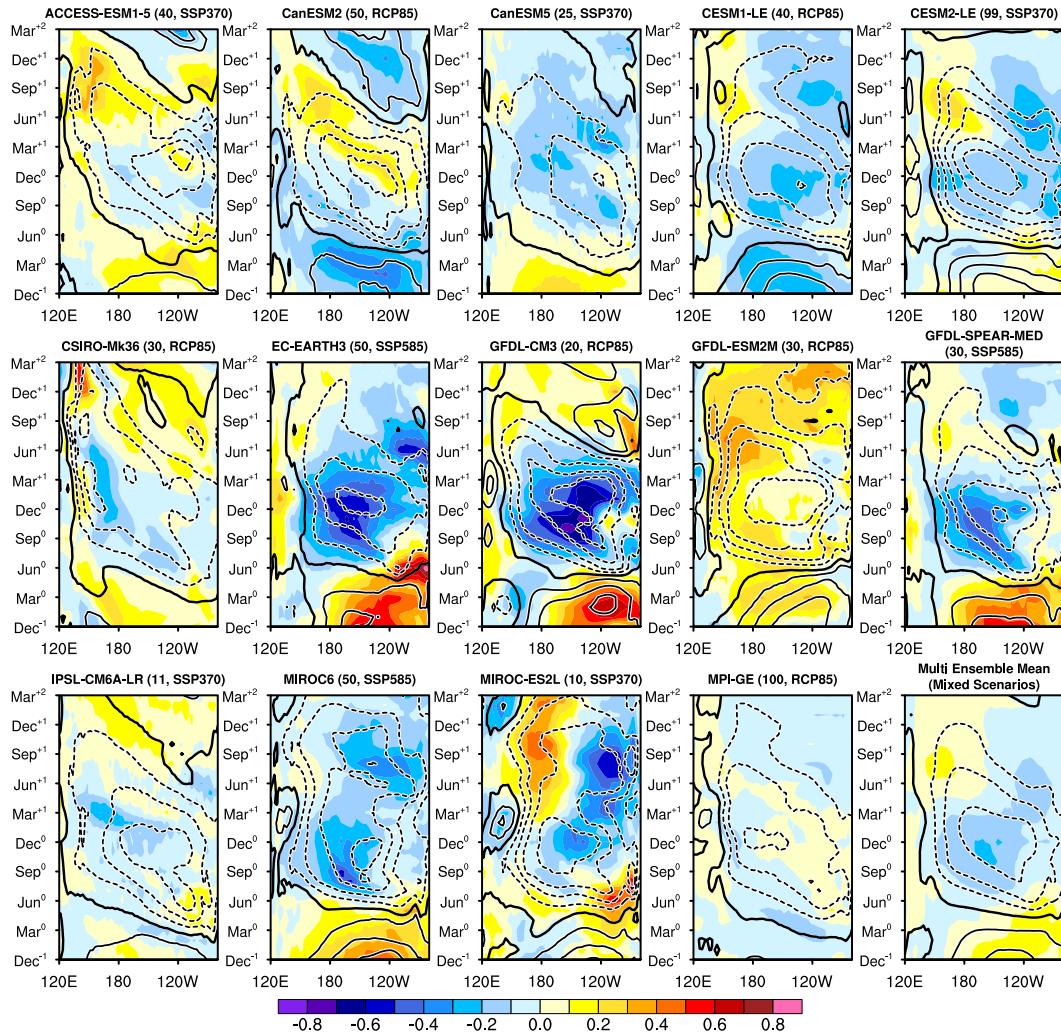

**Figure S7.** As in Figure 3, but for the difference between 2021-2050 and 1951-1980 and for La Niña

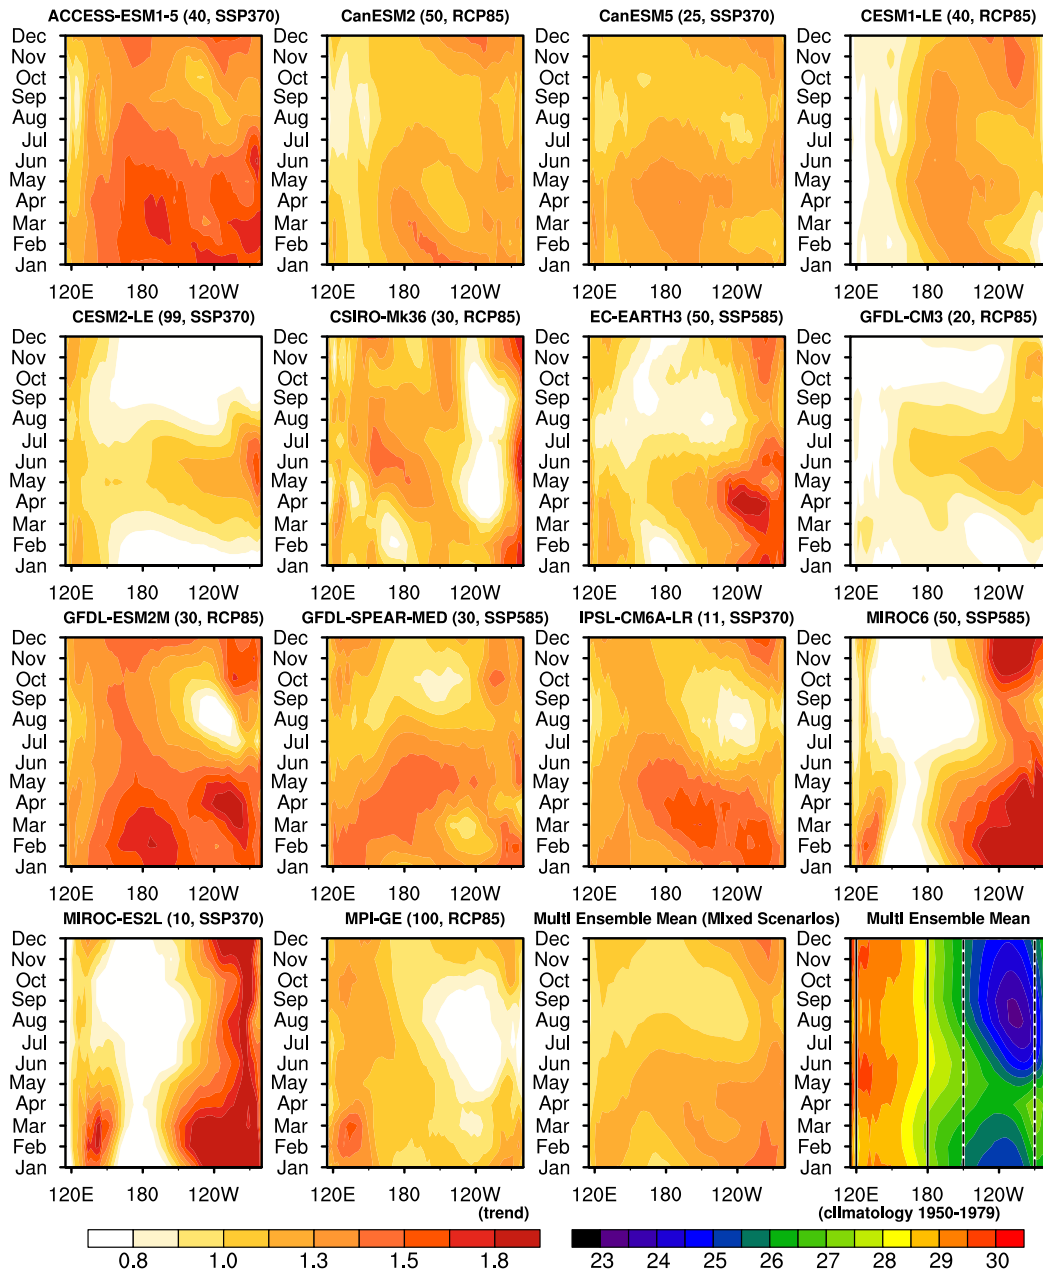

Figure S8. As in Figure 6, but for the period 1950-2014.
